# Supplementary material for: Degrading Characterization of the Newly Isolated Nocardioides sp. N39 for 3-Amino-5-methyl-isoxazole and the Related Genomic Information
Source: MDPI journal article supplement (doi:10.3390/microorganisms10081496), 2022-07-25
Supplement: s1 [file s1]

# Degrading characterization of newly isolated *Nocardioides* sp. N39 for 3-amino-5-methyl-isoxazole and its genomic information

Lei Yan <sup>1,2</sup>, Bin Liang <sup>3</sup>, Meng-Yuan Qi <sup>4</sup>, Ai-Jie Wang <sup>3,4</sup> and Zhi-Pei Liu <sup>1\*</sup>

<sup>1</sup> State Key Laboratory of Microbial Resources, Institute of Microbiology, Chinese Academy of Sciences, Beijing 100101, China; [shenglong00@126.com](mailto:shenglong00@126.com) (L.Y.); [liuzhp@im.ac.cn](mailto:liuzhp@im.ac.cn) (Z.-P. L.)

<sup>2</sup> University of Chinese Academy of Sciences, Beijing 100049, China

<sup>3</sup> State Key Laboratory of Urban Water Resource and Environment, Shenzhen Key Laboratory of Organic Pollution Prevention and Control, School of Civil & Environmental Engineering, Harbin Institute of Technology Shenzhen, Shenzhen 518055, China; [liangbin1214@hit.edu.cn](mailto:liangbin1214@hit.edu.cn) (B. L.); [waj0578@hit.edu.cn](mailto:waj0578@hit.edu.cn) (A.-J.W.)

<sup>4</sup> State Key Laboratory of Urban Water Resource and Environment, School of Environment, Harbin Institute of Technology, Harbin 150090, China; [382965860@qq.com](mailto:382965860@qq.com) (M.-Y.Q.)

\* Correspondence: [liuzhp@im.ac.cn](mailto:liuzhp@im.ac.cn); Tel.: +86-10-64806081

Table S1. The genes in N39 distinct to N40

| Length | Gene ID in N39       | Annotated function     | Corresponding gene ID in N40 | Percent identity |
|--------|----------------------|------------------------|------------------------------|------------------|
| 262    | fig 2045.14.peg.103  | hypothetical protein   |                              | 0                |
| 60     | fig 2045.14.peg.710  | hypothetical protein   |                              | 0                |
| 360    | fig 2045.14.peg.714  | hypothetical protein   |                              | 0                |
| 53     | fig 2045.14.peg.859  | hypothetical protein   |                              | 0                |
| 118    | fig 2045.14.peg.1134 | hypothetical protein   |                              | 0                |
| 38     | fig 2045.14.peg.1169 | Mobile element protein |                              | 0                |
| 349    | fig 2045.14.peg.1213 | hypothetical protein   |                              | 0                |
| 437    | fig 2045.14.peg.1214 | hypothetical protein   |                              | 0                |
| 456    | fig 2045.14.peg.1294 | hypothetical protein   |                              | 0                |
| 63     | fig 2045.14.peg.1491 | hypothetical protein   |                              | 0                |
| 41     | fig 2045.14.peg.2090 | hypothetical protein   |                              | 0                |
| 102    | fig 2045.14.peg.2096 | hypothetical protein   |                              | 0                |
| 159    | fig 2045.14.peg.2208 | hypothetical protein   |                              | 0                |
| 415    | fig 2045.14.peg.2485 | Mobile element protein |                              | 0                |
| 415    | fig 2045.14.peg.2489 | Mobile element protein |                              | 0                |
| 44     | fig 2045.14.peg.2528 | hypothetical protein   |                              | 0                |
| 101    | fig 2045.14.peg.2637 | hypothetical protein   |                              | 0                |
| 415    | fig 2045.14.peg.2712 | Mobile element protein |                              | 0                |
| 415    | fig 2045.14.peg.2752 | Mobile element protein |                              | 0                |
| 74     | fig 2045.14.peg.2765 | hypothetical protein   |                              | 0                |
| 415    | fig 2045.14.peg.2779 | Mobile element protein |                              | 0                |
| 415    | fig 2045.14.peg.2782 | Mobile element protein |                              | 0                |
| 415    | fig 2045.14.peg.2791 | Mobile element protein |                              | 0                |
| 48     | fig 2045.14.peg.2797 | hypothetical protein   |                              | 0                |
| 58     | fig 2045.14.peg.2799 | hypothetical protein   |                              | 0                |
| 51     | fig 2045.14.peg.2805 | hypothetical protein   |                              | 0                |
| 78     | fig 2045.14.peg.2814 | hypothetical protein   |                              | 0                |
| 81     | fig 2045.14.peg.2815 | hypothetical protein   |                              | 0                |
| 71     | fig 2045.14.peg.2816 | hypothetical protein   |                              | 0                |
| 45     | fig 2045.14.peg.2817 | hypothetical protein   |                              | 0                |
| 91     | fig 2045.14.peg.2948 | hypothetical protein   |                              | 0                |
| 94     | fig 2045.14.peg.2949 | hypothetical protein   |                              | 0                |
| 133    | fig 2045.14.peg.3003 | hypothetical protein   |                              | 0                |
| 50     | fig 2045.14.peg.3421 | hypothetical protein   |                              | 0                |
| 415    | fig 2045.14.peg.3735 | Mobile element protein |                              | 0                |
| 413    | fig 2045.14.peg.3745 | Mobile element protein |                              | 0                |
| 207    | fig 2045.14.peg.3771 | hypothetical protein   |                              | 0                |
| 57     | fig 2045.14.peg.3772 | hypothetical protein   |                              | 0                |
| 52     | fig 2045.14.peg.4357 | hypothetical protein   |                              | 0                |

|      |                      |                                        |                      |       |
|------|----------------------|----------------------------------------|----------------------|-------|
| 415  | fig 2045.14.peg.4506 | Mobile element protein                 |                      | 0     |
| 413  | fig 2045.14.peg.4516 | Mobile element protein                 |                      | 0     |
| 413  | fig 2045.14.peg.4532 | Mobile element protein                 |                      | 0     |
| 290  | fig 2045.14.peg.4623 | integrase catalytic subunit            |                      | 0     |
| 415  | fig 2045.14.peg.4657 | Mobile element protein                 |                      | 0     |
| 415  | fig 2045.14.peg.4669 | Mobile element protein                 |                      | 0     |
| 415  | fig 2045.14.peg.4679 | Mobile element protein                 |                      | 0     |
| 413  | fig 2045.14.peg.4703 | Mobile element protein                 |                      | 0     |
| 303  | fig 2045.14.peg.4731 | Mobile element protein                 |                      | 0     |
| 173  | fig 2045.14.peg.4744 | hypothetical protein                   |                      | 0     |
| 103  | fig 2045.14.peg.4758 | hypothetical protein                   |                      | 0     |
| 303  | fig 2045.14.peg.4762 | Mobile element protein                 |                      | 0     |
| 42   | fig 2045.14.peg.4776 | hypothetical protein                   |                      | 0     |
| 290  | fig 2045.14.peg.4783 | integrase catalytic subunit            |                      | 0     |
| 348  | fig 2045.14.peg.4785 | hypothetical protein                   |                      | 0     |
| 290  | fig 2045.14.peg.4794 | integrase catalytic subunit            |                      | 0     |
| 290  | fig 2045.14.peg.4919 | integrase catalytic subunit            |                      | 0     |
| 48   | fig 2045.14.peg.5055 | hypothetical protein                   |                      | 0     |
| 47   | fig 2045.14.peg.5348 | hypothetical protein                   |                      | 0     |
| 77   | fig 2045.14.peg.5627 | hypothetical protein                   |                      | 0     |
| 40   | fig 2045.14.peg.5831 | hypothetical protein                   |                      | 0     |
| 372  | fig 2045.14.peg.73   | hypothetical protein                   | fig 2045.18.peg.3996 | 99.46 |
| 41   | fig 2045.14.peg.173  | hypothetical protein                   | fig 2045.18.peg.4096 | 97.5  |
|      |                      | Osmosensitive K <sup>+</sup> channel   |                      |       |
| 637  | fig 2045.14.peg.398  | histidine kinase KdpD (EC 2.7.3.-)     | fig 2045.18.peg.4322 | 99.74 |
| 616  | fig 2045.14.peg.445  | Mlr6999 protein                        | fig 2045.18.peg.4369 | 99.84 |
| 262  | fig 2045.14.peg.572  | hypothetical protein                   | fig 2045.18.peg.4497 | 99.61 |
| 45   | fig 2045.14.peg.706  | hypothetical protein                   | fig 2045.18.peg.4633 | 97.73 |
| 350  | fig 2045.14.peg.708  | hypothetical protein                   | fig 2045.18.peg.4635 | 99.71 |
| 621  | fig 2045.14.peg.784  | hypothetical protein                   | fig 2045.18.peg.4709 | 99.81 |
| 279  | fig 2045.14.peg.867  | hypothetical protein                   | fig 2045.18.peg.4791 | 99.64 |
| 50   | fig 2045.14.peg.934  | hypothetical protein                   | fig 2045.18.peg.4858 | 97.96 |
| 1013 | fig 2045.14.peg.1073 | hypothetical protein                   | fig 2045.18.peg.4998 | 99.9  |
| 144  | fig 2045.14.peg.1192 | hypothetical protein                   | fig 2045.18.peg.5119 | 99.3  |
| 225  | fig 2045.14.peg.1409 | hypothetical protein                   | fig 2045.18.peg.5336 | 99.49 |
| 197  | fig 2045.14.peg.1651 | hypothetical protein                   | fig 2045.18.peg.5578 | 99.35 |
| 384  | fig 2045.14.peg.1858 | hypothetical protein                   | fig 2045.18.peg.5785 | 99.74 |
| 308  | fig 2045.14.peg.1889 | hypothetical protein                   | fig 2045.18.peg.5816 | 99.5  |
| 252  | fig 2045.14.peg.1955 | hypothetical protein                   | fig 2045.18.peg.5882 | 99.6  |
| 318  | fig 2045.14.peg.2040 | Transcriptional regulator, LysR family | fig 2045.18.peg.5967 | 99.66 |
| 155  | fig 2045.14.peg.2054 | hypothetical protein                   | fig 2045.18.peg.5981 | 99.35 |

|      |                      |                                                                 |                      |       |
|------|----------------------|-----------------------------------------------------------------|----------------------|-------|
| 587  | fig 2045.14.peg.2073 | hypothetical protein                                            | fig 2045.18.peg.6000 | 99.83 |
| 215  | fig 2045.14.peg.2117 | hypothetical protein                                            | fig 2045.18.peg.6043 | 99.27 |
| 83   | fig 2045.14.peg.2212 | hypothetical protein                                            | fig 2045.18.peg.6139 | 98.51 |
| 333  | fig 2045.14.peg.2354 | Glycine oxidase ThiO (EC 1.4.3.19)                              | fig 2045.18.peg.278  | 99.39 |
| 40   | fig 2045.14.peg.2488 | hypothetical protein                                            | fig 2045.18.peg.412  | 97.44 |
| 226  | fig 2045.14.peg.2492 | hypothetical protein                                            | fig 2045.18.peg.416  | 98.75 |
| 153  | fig 2045.14.peg.2522 | hypothetical protein                                            | fig 2045.18.peg.447  | 98.73 |
| 782  | fig 2045.14.peg.2523 | ATP-dependent DNA helicase UvrD/PcrA (EC 3.6.4.12)              | fig 2045.18.peg.448  | 99.87 |
| 333  | fig 2045.14.peg.2588 | hypothetical protein                                            | fig 2045.18.peg.512  | 99.69 |
| 526  | fig 2045.14.peg.2597 | Cys-tRNA(Pro) deacylase YbaK                                    | fig 2045.18.peg.521  | 99.8  |
| 205  | fig 2045.14.peg.2666 | hypothetical protein                                            | fig 2045.18.peg.592  | 99.41 |
| 216  | fig 2045.14.peg.2750 | hypothetical protein                                            | fig 2045.18.peg.677  | 99.49 |
| 189  | fig 2045.14.peg.2766 | integrase family protein                                        | fig 2045.18.peg.694  | 99.46 |
| 151  | fig 2045.14.peg.2871 | hypothetical protein                                            | fig 2045.18.peg.793  | 99.33 |
| 412  | fig 2045.14.peg.2993 | hypothetical protein                                            | fig 2045.18.peg.915  | 99.68 |
| 467  | fig 2045.14.peg.3001 | hypothetical protein                                            | fig 2045.18.peg.923  | 99.79 |
| 301  | fig 2045.14.peg.3002 | hypothetical protein                                            | fig 2045.18.peg.924  | 99.67 |
| 351  | fig 2045.14.peg.3004 | ABC transporter, permease protein (cluster 8, B12/iron complex) | fig 2045.18.peg.925  | 99.71 |
| 538  | fig 2045.14.peg.3286 | P-loop GTPase domain-containing protein Sros_8871               | fig 2045.18.peg.1208 | 97.17 |
| 463  | fig 2045.14.peg.3297 | hypothetical protein                                            | fig 2045.18.peg.1219 | 99.7  |
| 160  | fig 2045.14.peg.3420 | hypothetical protein                                            | fig 2045.18.peg.1343 | 99.37 |
| 59   | fig 2045.14.peg.3516 | hypothetical protein                                            | fig 2045.18.peg.1439 | 97.92 |
| 400  | fig 2045.14.peg.3590 | Cell division protein FtsZ                                      | fig 2045.18.peg.1513 | 99.25 |
| 865  | fig 2045.14.peg.3744 | hypothetical protein                                            | fig 2045.18.peg.1667 | 99.88 |
| 167  | fig 2045.14.peg.4017 | hypothetical protein                                            | fig 2045.18.peg.1938 | 99.4  |
| 868  | fig 2045.14.peg.4107 | Acetoacetyl-CoA synthetase (EC 6.2.1.16)                        | fig 2045.18.peg.2028 | 99.88 |
| 452  | fig 2045.14.peg.4282 | 16S rRNA (cytosine(967)-C(5))-methyltransferase (EC 2.1.1.176)  | fig 2045.18.peg.2203 | 98.9  |
| 1137 | fig 2045.14.peg.4416 | hypothetical protein                                            | fig 2045.18.peg.2338 | 98.42 |
| 201  | fig 2045.14.peg.4489 | Phage tail fiber protein                                        | fig 2045.18.peg.2412 | 99.5  |
| 70   | fig 2045.14.peg.4553 | hypothetical protein                                            | fig 2045.18.peg.2477 | 98.55 |
| 818  | fig 2045.14.peg.4589 | DNA translocase FtsK                                            | fig 2045.18.peg.2513 | 99.87 |

|      |                      |                                                                                                                   |                      |       |
|------|----------------------|-------------------------------------------------------------------------------------------------------------------|----------------------|-------|
| 43   | fig 2045.14.peg.4617 | hypothetical protein                                                                                              | fig 2045.18.peg.27   | 89.29 |
| 56   | fig 2045.14.peg.4625 | hypothetical protein                                                                                              | fig 2045.18.peg.2550 | 98.18 |
| 1984 | fig 2045.14.peg.4659 | Relaxase TrwC / Conjugal transfer protein TraA / DNA primase (EC 2.7.7.-), conjugative                            | fig 2045.18.peg.2584 | 99.09 |
| 95   | fig 2045.14.peg.4764 | ATP/GTP-binding protein                                                                                           | fig 2045.18.peg.2688 | 98.94 |
| 235  | fig 2045.14.peg.4799 | Integral membrane protein                                                                                         | fig 2045.18.peg.2723 | 99.57 |
| 1063 | fig 2045.14.peg.5043 | Putative large secreted protein SCO0341                                                                           | fig 2045.18.peg.2968 | 99.9  |
| 476  | fig 2045.14.peg.5150 | Molybdopterin-binding oxidoreductase, [4Fe-4S] cluster binding and molybdopterin cofactor binding site containing | fig 2045.18.peg.3075 | 99.79 |
| 409  | fig 2045.14.peg.5360 | FIG01111984: hypothetical protein                                                                                 | fig 2045.18.peg.3285 | 95.83 |
| 293  | fig 2045.14.peg.5432 | hypothetical protein                                                                                              | fig 2045.18.peg.3357 | 99.66 |
| 283  | fig 2045.14.peg.5463 | hypothetical protein                                                                                              | fig 2045.18.peg.3388 | 99.29 |
| 185  | fig 2045.14.peg.5464 | hypothetical protein                                                                                              | fig 2045.18.peg.3389 | 98.48 |
| 114  | fig 2045.14.peg.5510 | hypothetical protein                                                                                              | fig 2045.18.peg.3437 | 98.63 |
| 126  | fig 2045.14.peg.5625 | FIG01121360: hypothetical protein                                                                                 | fig 2045.18.peg.3553 | 98.97 |
| 955  | fig 2045.14.peg.5629 | Glycosyl transferase, family 2                                                                                    | fig 2045.18.peg.3557 | 99.9  |
| 294  | fig 2045.14.peg.5650 | Transcriptional regulator, LysR family                                                                            | fig 2045.18.peg.3578 | 99.66 |
| 407  | fig 2045.14.peg.5652 | Cell envelope-associated transcriptional attenuator LytR-CpsA-Psr, subfamily A1                                   | fig 2045.18.peg.3580 | 99.67 |
| 306  | fig 2045.14.peg.506  | Beta-glucanase precursor (EC 3.2.1.73)                                                                            | fig 2045.18.peg.343  | 56.03 |
| 289  | fig 2045.14.peg.709  | hypothetical protein                                                                                              | fig 2045.18.peg.4636 | 99.65 |

Table S2. The genomic SNP/indel analysis between strain N39 and N40

| Location of<br>SNP/indel<br>site in N39 | The base<br>in N39 | The base<br>in N40 | Location of<br>SNP/indel<br>site in N40 | Contig of<br>SNP/indel site in<br>N39 | Contig of<br>SNP/indel site in<br>N40 |
|-----------------------------------------|--------------------|--------------------|-----------------------------------------|---------------------------------------|---------------------------------------|
| 61194                                   | G                  | T                  | 3824609                                 | N39-chromosome                        | N40-chromosome                        |
| 72818                                   | A                  | T                  | 3836233                                 | N39-chromosome                        | N40-chromosome                        |
| 72821                                   | A                  | C                  | 3836236                                 | N39-chromosome                        | N40-chromosome                        |
| 101455                                  | G                  | .                  | 3864869                                 | N39-chromosome                        | N40-chromosome                        |
| 101457                                  | G                  | C                  | 3864871                                 | N39-chromosome                        | N40-chromosome                        |
| 101458                                  | G                  | T                  | 3864872                                 | N39-chromosome                        | N40-chromosome                        |
| 101464                                  | C                  | G                  | 3864878                                 | N39-chromosome                        | N40-chromosome                        |
| 101466                                  | C                  | A                  | 3864880                                 | N39-chromosome                        | N40-chromosome                        |
| 101470                                  | G                  | C                  | 3864884                                 | N39-chromosome                        | N40-chromosome                        |
| 101474                                  | G                  | .                  | 3864887                                 | N39-chromosome                        | N40-chromosome                        |
| 101475                                  | C                  | .                  | 3864887                                 | N39-chromosome                        | N40-chromosome                        |
| 101476                                  | C                  | .                  | 3864887                                 | N39-chromosome                        | N40-chromosome                        |
| 101479                                  | C                  | A                  | 3864890                                 | N39-chromosome                        | N40-chromosome                        |
| 343931                                  | C                  | .                  | 4107341                                 | N39-chromosome                        | N40-chromosome                        |
| 343932                                  | C                  | T                  | 4107342                                 | N39-chromosome                        | N40-chromosome                        |
| 407251                                  | G                  | .                  | 4170660                                 | N39-chromosome                        | N40-chromosome                        |
| 466189                                  | G                  | .                  | 4229597                                 | N39-chromosome                        | N40-chromosome                        |
| 689383                                  | G                  | .                  | 4452790                                 | N39-chromosome                        | N40-chromosome                        |
| 748087                                  | .                  | G                  | 4511495                                 | N39-chromosome                        | N40-chromosome                        |
| 748281                                  | .                  | G                  | 4511690                                 | N39-chromosome                        | N40-chromosome                        |
| 751397                                  | .                  | C                  | 4514807                                 | N39-chromosome                        | N40-chromosome                        |
| 751397                                  | .                  | G                  | 4514808                                 | N39-chromosome                        | N40-chromosome                        |
| 876999                                  | G                  | A                  | 4640410                                 | N39-chromosome                        | N40-chromosome                        |
| 985655                                  | C                  | G                  | 4749066                                 | N39-chromosome                        | N40-chromosome                        |
| 1290993                                 | A                  | C                  | 5054404                                 | N39-chromosome                        | N40-chromosome                        |
| 1449191                                 | G                  | .                  | 5212629                                 | N39-chromosome                        | N40-chromosome                        |
| 1919982                                 | A                  | G                  | 5683420                                 | N39-chromosome                        | N40-chromosome                        |
| 2189763                                 | .                  | T                  | 5951759                                 | N39-chromosome                        | N40-chromosome                        |
| 2264647                                 | .                  | G                  | 6026644                                 | N39-chromosome                        | N40-chromosome                        |
| 2264647                                 | .                  | C                  | 6026645                                 | N39-chromosome                        | N40-chromosome                        |
| 2264647                                 | .                  | C                  | 6026646                                 | N39-chromosome                        | N40-chromosome                        |
| 2264647                                 | .                  | C                  | 6026647                                 | N39-chromosome                        | N40-chromosome                        |
| 2264647                                 | .                  | C                  | 6026648                                 | N39-chromosome                        | N40-chromosome                        |
| 2264647                                 | .                  | C                  | 6026649                                 | N39-chromosome                        | N40-chromosome                        |
| 2264647                                 | .                  | C                  | 6026650                                 | N39-chromosome                        | N40-chromosome                        |
| 2264647                                 | .                  | C                  | 6026651                                 | N39-chromosome                        | N40-chromosome                        |
| 2264647                                 | .                  | C                  | 6026652                                 | N39-chromosome                        | N40-chromosome                        |
| 2264647                                 | .                  | C                  | 6026653                                 | N39-chromosome                        | N40-chromosome                        |

|         |   |   |         |                |                |
|---------|---|---|---------|----------------|----------------|
| 2264647 | . | C | 6026654 | N39-chromosome | N40-chromosome |
| 2264647 | . | C | 6026655 | N39-chromosome | N40-chromosome |
| 2264647 | . | C | 6026656 | N39-chromosome | N40-chromosome |
| 2264647 | . | C | 6026657 | N39-chromosome | N40-chromosome |
| 2264647 | . | C | 6026658 | N39-chromosome | N40-chromosome |
| 2264647 | . | C | 6026659 | N39-chromosome | N40-chromosome |
| 2264647 | . | G | 6026660 | N39-chromosome | N40-chromosome |
| 2264647 | . | G | 6026661 | N39-chromosome | N40-chromosome |
| 2264655 | T | G | 6026669 | N39-chromosome | N40-chromosome |
| 2264656 | C | G | 6026670 | N39-chromosome | N40-chromosome |
| 2264658 | T | G | 6026672 | N39-chromosome | N40-chromosome |
| 2264659 | . | G | 6026674 | N39-chromosome | N40-chromosome |
| 2264659 | . | G | 6026675 | N39-chromosome | N40-chromosome |
| 2264659 | . | G | 6026676 | N39-chromosome | N40-chromosome |
| 2264659 | . | G | 6026677 | N39-chromosome | N40-chromosome |
| 2264659 | . | G | 6026678 | N39-chromosome | N40-chromosome |
| 2264659 | . | C | 6026679 | N39-chromosome | N40-chromosome |
| 2264659 | . | C | 6026680 | N39-chromosome | N40-chromosome |
| 2264659 | . | C | 6026681 | N39-chromosome | N40-chromosome |
| 2264659 | . | C | 6026682 | N39-chromosome | N40-chromosome |
| 2264659 | . | C | 6026683 | N39-chromosome | N40-chromosome |
| 2264661 | G | C | 6026685 | N39-chromosome | N40-chromosome |
| 2264662 | A | C | 6026686 | N39-chromosome | N40-chromosome |
| 2414870 | C | . | 85899   | N39-chromosome | N40-chromosome |
| 2414871 | A | . | 85899   | N39-chromosome | N40-chromosome |
| 2778514 | G | . | 449541  | N39-chromosome | N40-chromosome |
| 3078737 | . | C | 748330  | N39-chromosome | N40-chromosome |
| 3078737 | . | C | 748331  | N39-chromosome | N40-chromosome |
| 3090687 | . | G | 760282  | N39-chromosome | N40-chromosome |
| 3091745 | G | . | 761339  | N39-chromosome | N40-chromosome |
| 3091746 | A | . | 761339  | N39-chromosome | N40-chromosome |
| 3091762 | C | G | 761355  | N39-chromosome | N40-chromosome |
| 3091834 | . | C | 761428  | N39-chromosome | N40-chromosome |
| 3227568 | C | . | 897161  | N39-chromosome | N40-chromosome |
| 3399408 | C | . | 1069000 | N39-chromosome | N40-chromosome |
| 3399409 | G | . | 1069000 | N39-chromosome | N40-chromosome |
| 3411751 | G | . | 1081341 | N39-chromosome | N40-chromosome |
| 3437540 | G | T | 1107130 | N39-chromosome | N40-chromosome |
| 3459593 | G | . | 1129182 | N39-chromosome | N40-chromosome |
| 3561499 | G | . | 1231087 | N39-chromosome | N40-chromosome |
| 3697655 | A | . | 1367242 | N39-chromosome | N40-chromosome |
| 3697660 | . | G | 1367248 | N39-chromosome | N40-chromosome |
| 4014681 | G | A | 1684269 | N39-chromosome | N40-chromosome |

|         |   |   |         |                |                |
|---------|---|---|---------|----------------|----------------|
| 4105367 | A | C | 1773829 | N39-chromosome | N40-chromosome |
| 4393721 | G | C | 2062183 | N39-chromosome | N40-chromosome |
| 4393723 | . | C | 2062186 | N39-chromosome | N40-chromosome |
| 4393723 | . | C | 2062187 | N39-chromosome | N40-chromosome |
| 4393723 | . | C | 2062188 | N39-chromosome | N40-chromosome |
| 4393723 | . | C | 2062189 | N39-chromosome | N40-chromosome |
| 4393723 | . | C | 2062190 | N39-chromosome | N40-chromosome |
| 4393723 | . | C | 2062191 | N39-chromosome | N40-chromosome |
| 4393723 | . | C | 2062192 | N39-chromosome | N40-chromosome |
| 4393723 | . | C | 2062193 | N39-chromosome | N40-chromosome |
| 4393723 | . | C | 2062194 | N39-chromosome | N40-chromosome |
| 4393723 | . | C | 2062195 | N39-chromosome | N40-chromosome |
| 4393723 | . | C | 2062196 | N39-chromosome | N40-chromosome |
| 4393723 | . | C | 2062197 | N39-chromosome | N40-chromosome |
| 4393723 | . | C | 2062198 | N39-chromosome | N40-chromosome |
| 4393723 | . | T | 2062199 | N39-chromosome | N40-chromosome |
| 4393726 | G | T | 2062202 | N39-chromosome | N40-chromosome |
| 4393728 | C | A | 2062204 | N39-chromosome | N40-chromosome |
| 4393729 | G | A | 2062205 | N39-chromosome | N40-chromosome |
| 4393732 | G | A | 2062208 | N39-chromosome | N40-chromosome |
| 4393733 | . | A | 2062210 | N39-chromosome | N40-chromosome |
| 4393733 | . | A | 2062211 | N39-chromosome | N40-chromosome |
| 4393737 | C | G | 2062215 | N39-chromosome | N40-chromosome |
| 4393738 | . | C | 2062217 | N39-chromosome | N40-chromosome |
| 4393738 | . | A | 2062218 | N39-chromosome | N40-chromosome |
| 4393738 | . | T | 2062219 | N39-chromosome | N40-chromosome |
| 4393738 | . | A | 2062220 | N39-chromosome | N40-chromosome |
| 4393738 | . | C | 2062221 | N39-chromosome | N40-chromosome |
| 4393740 | . | G | 2062224 | N39-chromosome | N40-chromosome |
| 4393740 | . | A | 2062225 | N39-chromosome | N40-chromosome |
| 4393740 | . | T | 2062226 | N39-chromosome | N40-chromosome |
| 4393740 | . | T | 2062227 | N39-chromosome | N40-chromosome |
| 4393740 | . | A | 2062228 | N39-chromosome | N40-chromosome |
| 4393740 | . | G | 2062229 | N39-chromosome | N40-chromosome |
| 4393746 | . | T | 2062236 | N39-chromosome | N40-chromosome |
| 4393747 | . | A | 2062238 | N39-chromosome | N40-chromosome |
| 4393747 | . | C | 2062239 | N39-chromosome | N40-chromosome |
| 4393749 | C | G | 2062241 | N39-chromosome | N40-chromosome |
| 4393752 | . | T | 2062245 | N39-chromosome | N40-chromosome |
| 4393753 | C | T | 2062246 | N39-chromosome | N40-chromosome |
| 4393757 | . | C | 2062251 | N39-chromosome | N40-chromosome |
| 4393757 | . | G | 2062252 | N39-chromosome | N40-chromosome |
| 4393757 | . | T | 2062253 | N39-chromosome | N40-chromosome |



|         |   |   |         |                |                |
|---------|---|---|---------|----------------|----------------|
| 4393757 | . | G | 2062254 | N39-chromosome | N40-chromosome |
| 4393757 | . | T | 2062255 | N39-chromosome | N40-chromosome |
| 4393760 | . | C | 2062259 | N39-chromosome | N40-chromosome |
| 4393760 | . | T | 2062260 | N39-chromosome | N40-chromosome |
| 4393760 | . | T | 2062261 | N39-chromosome | N40-chromosome |
| 4393760 | . | C | 2062262 | N39-chromosome | N40-chromosome |
| 4393762 | . | A | 2062265 | N39-chromosome | N40-chromosome |
| 4393762 | . | T | 2062266 | N39-chromosome | N40-chromosome |
| 4393762 | . | C | 2062267 | N39-chromosome | N40-chromosome |
| 4393763 | . | G | 2062269 | N39-chromosome | N40-chromosome |
| 4393763 | . | G | 2062270 | N39-chromosome | N40-chromosome |
| 4393763 | . | C | 2062271 | N39-chromosome | N40-chromosome |
| 4393775 | A | C | 2062283 | N39-chromosome | N40-chromosome |
| 4705674 | . | C | 2375559 | N39-chromosome | N40-chromosome |
| 4707326 | . | G | 2377212 | N39-chromosome | N40-chromosome |
| 4734300 | G | C | 2404186 | N39-chromosome | N40-chromosome |
| 4734312 | C | G | 2404198 | N39-chromosome | N40-chromosome |
| 4734317 | A | G | 2404203 | N39-chromosome | N40-chromosome |
| 4734351 | C | G | 2404237 | N39-chromosome | N40-chromosome |
| 4734384 | C | A | 2404270 | N39-chromosome | N40-chromosome |
| 4734393 | C | G | 2404279 | N39-chromosome | N40-chromosome |
| 4734426 | C | G | 2404312 | N39-chromosome | N40-chromosome |
| 4734438 | C | T | 2404324 | N39-chromosome | N40-chromosome |
| 4734462 | C | G | 2404348 | N39-chromosome | N40-chromosome |
| 4734477 | C | G | 2404363 | N39-chromosome | N40-chromosome |
| 4734594 | T | G | 2404480 | N39-chromosome | N40-chromosome |
| 4734699 | C | . | 2404584 | N39-chromosome | N40-chromosome |
| 4734701 | . | T | 2404587 | N39-chromosome | N40-chromosome |
| 4734866 | A | G | 2404752 | N39-chromosome | N40-chromosome |
| 4734897 | G | T | 2404783 | N39-chromosome | N40-chromosome |
| 4734987 | A | C | 2404873 | N39-chromosome | N40-chromosome |
| 4735014 | C | A | 2404900 | N39-chromosome | N40-chromosome |
| 4735015 | C | G | 2404901 | N39-chromosome | N40-chromosome |
| 4735017 | C | T | 2404903 | N39-chromosome | N40-chromosome |
| 4735034 | A | T | 2404920 | N39-chromosome | N40-chromosome |
| 4735056 | A | C | 2404942 | N39-chromosome | N40-chromosome |
| 4735069 | A | C | 2404955 | N39-chromosome | N40-chromosome |
| 4735074 | C | A | 2404960 | N39-chromosome | N40-chromosome |
| 4735497 | G | T | 2405383 | N39-chromosome | N40-chromosome |
| 4735503 | C | T | 2405389 | N39-chromosome | N40-chromosome |
| 4735713 | C | G | 2405599 | N39-chromosome | N40-chromosome |
| 4735836 | C | A | 2405722 | N39-chromosome | N40-chromosome |
| 4735956 | C | T | 2405842 | N39-chromosome | N40-chromosome |

|         |   |   |         |                |                |
|---------|---|---|---------|----------------|----------------|
| 4735962 | C | T | 2405848 | N39-chromosome | N40-chromosome |
| 4736169 | A | G | 2406055 | N39-chromosome | N40-chromosome |
| 4736193 | C | T | 2406079 | N39-chromosome | N40-chromosome |
| 4736220 | A | G | 2406106 | N39-chromosome | N40-chromosome |
| 4736254 | C | A | 2406140 | N39-chromosome | N40-chromosome |
| 4736343 | C | G | 2406229 | N39-chromosome | N40-chromosome |
| 4736406 | C | G | 2406292 | N39-chromosome | N40-chromosome |
| 4736429 | C | G | 2406315 | N39-chromosome | N40-chromosome |
| 4736478 | C | G | 2406364 | N39-chromosome | N40-chromosome |
| 4736499 | C | G | 2406385 | N39-chromosome | N40-chromosome |
| 4736556 | C | G | 2406442 | N39-chromosome | N40-chromosome |
| 4736559 | C | G | 2406445 | N39-chromosome | N40-chromosome |
| 4736586 | C | G | 2406472 | N39-chromosome | N40-chromosome |
| 4736589 | C | A | 2406475 | N39-chromosome | N40-chromosome |
| 4736610 | A | G | 2406496 | N39-chromosome | N40-chromosome |
| 4736619 | C | G | 2406505 | N39-chromosome | N40-chromosome |
| 4736646 | C | T | 2406532 | N39-chromosome | N40-chromosome |
| 4736650 | G | C | 2406536 | N39-chromosome | N40-chromosome |
| 4736661 | C | T | 2406547 | N39-chromosome | N40-chromosome |
| 4736718 | G | C | 2406604 | N39-chromosome | N40-chromosome |
| 4736721 | C | G | 2406607 | N39-chromosome | N40-chromosome |
| 4736725 | A | G | 2406611 | N39-chromosome | N40-chromosome |
| 4736729 | C | G | 2406615 | N39-chromosome | N40-chromosome |
| 4736730 | G | C | 2406616 | N39-chromosome | N40-chromosome |
| 4736739 | A | C | 2406625 | N39-chromosome | N40-chromosome |
| 4736742 | G | C | 2406628 | N39-chromosome | N40-chromosome |
| 4736743 | G | C | 2406629 | N39-chromosome | N40-chromosome |
| 4736746 | C | G | 2406632 | N39-chromosome | N40-chromosome |
| 4736763 | G | C | 2406649 | N39-chromosome | N40-chromosome |
| 4736766 | C | G | 2406652 | N39-chromosome | N40-chromosome |
| 4736771 | G | A | 2406657 | N39-chromosome | N40-chromosome |
| 4736773 | A | G | 2406659 | N39-chromosome | N40-chromosome |
| 4736775 | C | G | 2406661 | N39-chromosome | N40-chromosome |
| 4736793 | G | C | 2406679 | N39-chromosome | N40-chromosome |
| 4736796 | A | C | 2406682 | N39-chromosome | N40-chromosome |
| 4736811 | G | C | 2406697 | N39-chromosome | N40-chromosome |
| 4736814 | G | T | 2406700 | N39-chromosome | N40-chromosome |
| 4736842 | T | C | 2406728 | N39-chromosome | N40-chromosome |
| 4736859 | A | C | 2406745 | N39-chromosome | N40-chromosome |
| 4736868 | C | G | 2406754 | N39-chromosome | N40-chromosome |
| 4736886 | A | C | 2406772 | N39-chromosome | N40-chromosome |
| 4736889 | A | G | 2406775 | N39-chromosome | N40-chromosome |
| 4736893 | G | A | 2406779 | N39-chromosome | N40-chromosome |

|         |   |   |         |                |                |
|---------|---|---|---------|----------------|----------------|
| 4736901 | C | G | 2406787 | N39-chromosome | N40-chromosome |
| 4736916 | G | A | 2406802 | N39-chromosome | N40-chromosome |
| 4736958 | C | G | 2406844 | N39-chromosome | N40-chromosome |
| 4736991 | C | G | 2406877 | N39-chromosome | N40-chromosome |
| 4737003 | G | A | 2406889 | N39-chromosome | N40-chromosome |
| 4737010 | C | G | 2406896 | N39-chromosome | N40-chromosome |
| 4737021 | C | G | 2406907 | N39-chromosome | N40-chromosome |
| 4737039 | C | T | 2406925 | N39-chromosome | N40-chromosome |
| 4737049 | G | T | 2406935 | N39-chromosome | N40-chromosome |
| 4962724 | C | A | 2632610 | N39-chromosome | N40-chromosome |
| 4962730 | T | G | 2632616 | N39-chromosome | N40-chromosome |
| 5036806 | G | . | 2706691 | N39-chromosome | N40-chromosome |
| 5036807 | A | . | 2706691 | N39-chromosome | N40-chromosome |
| 5134660 | G | . | 2804543 | N39-chromosome | N40-chromosome |
| 5134661 | C | . | 2804543 | N39-chromosome | N40-chromosome |
| 5134662 | C | . | 2804543 | N39-chromosome | N40-chromosome |
| 5134663 | G | . | 2804543 | N39-chromosome | N40-chromosome |
| 5247818 | G | C | 2917698 | N39-chromosome | N40-chromosome |
| 5349832 | G | C | 3019712 | N39-chromosome | N40-chromosome |
| 5457830 | G | . | 3127709 | N39-chromosome | N40-chromosome |
| 5457831 | G | . | 3127709 | N39-chromosome | N40-chromosome |
| 5457832 | C | . | 3127709 | N39-chromosome | N40-chromosome |
| 5457833 | G | . | 3127709 | N39-chromosome | N40-chromosome |
| 5457834 | C | . | 3127709 | N39-chromosome | N40-chromosome |
| 5457835 | G | . | 3127709 | N39-chromosome | N40-chromosome |
| 5457836 | G | . | 3127709 | N39-chromosome | N40-chromosome |
| 5457837 | G | . | 3127709 | N39-chromosome | N40-chromosome |
| 5457841 | G | . | 3127712 | N39-chromosome | N40-chromosome |
| 5457842 | G | . | 3127712 | N39-chromosome | N40-chromosome |
| 5457843 | C | . | 3127712 | N39-chromosome | N40-chromosome |
| 5457844 | C | . | 3127712 | N39-chromosome | N40-chromosome |
| 5457845 | G | . | 3127712 | N39-chromosome | N40-chromosome |
| 5457846 | G | . | 3127712 | N39-chromosome | N40-chromosome |
| 5457847 | A | . | 3127712 | N39-chromosome | N40-chromosome |
| 5457848 | G | . | 3127712 | N39-chromosome | N40-chromosome |
| 5457849 | C | . | 3127712 | N39-chromosome | N40-chromosome |
| 5457850 | G | . | 3127712 | N39-chromosome | N40-chromosome |
| 5457851 | G | . | 3127712 | N39-chromosome | N40-chromosome |
| 5457852 | C | . | 3127712 | N39-chromosome | N40-chromosome |
| 5457853 | C | . | 3127712 | N39-chromosome | N40-chromosome |
| 5457854 | G | . | 3127712 | N39-chromosome | N40-chromosome |
| 5457855 | G | . | 3127712 | N39-chromosome | N40-chromosome |
| 5457856 | G | . | 3127712 | N39-chromosome | N40-chromosome |

|         |   |   |         |                |                |
|---------|---|---|---------|----------------|----------------|
| 5457860 | T | . | 3127715 | N39-chromosome | N40-chromosome |
| 5457861 | G | . | 3127715 | N39-chromosome | N40-chromosome |
| 5457862 | C | . | 3127715 | N39-chromosome | N40-chromosome |
| 5457863 | T | . | 3127715 | N39-chromosome | N40-chromosome |
| 5457864 | G | . | 3127715 | N39-chromosome | N40-chromosome |
| 5457865 | C | . | 3127715 | N39-chromosome | N40-chromosome |
| 5457866 | T | . | 3127715 | N39-chromosome | N40-chromosome |
| 5457867 | G | . | 3127715 | N39-chromosome | N40-chromosome |
| 5457868 | C | . | 3127715 | N39-chromosome | N40-chromosome |
| 5457869 | G | . | 3127715 | N39-chromosome | N40-chromosome |
| 5457870 | G | . | 3127715 | N39-chromosome | N40-chromosome |
| 5457871 | G | . | 3127715 | N39-chromosome | N40-chromosome |
| 5457872 | A | . | 3127715 | N39-chromosome | N40-chromosome |
| 5457873 | C | . | 3127715 | N39-chromosome | N40-chromosome |
| 5457874 | G | . | 3127715 | N39-chromosome | N40-chromosome |
| 5457875 | G | . | 3127715 | N39-chromosome | N40-chromosome |
| 5457876 | G | . | 3127715 | N39-chromosome | N40-chromosome |
| 5457878 | T | . | 3127716 | N39-chromosome | N40-chromosome |
| 5563526 | C | G | 3233364 | N39-chromosome | N40-chromosome |
| 5563528 | T | C | 3233366 | N39-chromosome | N40-chromosome |
| 5563529 | G | T | 3233367 | N39-chromosome | N40-chromosome |
| 5563531 | T | G | 3233369 | N39-chromosome | N40-chromosome |
| 5564464 | C | . | 3234301 | N39-chromosome | N40-chromosome |
| 5564522 | C | . | 3234358 | N39-chromosome | N40-chromosome |
| 5564523 | C | . | 3234358 | N39-chromosome | N40-chromosome |
| 5564524 | C | . | 3234358 | N39-chromosome | N40-chromosome |
| 5564525 | C | . | 3234358 | N39-chromosome | N40-chromosome |
| 5741184 | C | A | 3412104 | N39-chromosome | N40-chromosome |
| 5764887 | T | G | 3435807 | N39-chromosome | N40-chromosome |
| 5765632 | C | . | 3436551 | N39-chromosome | N40-chromosome |
| 5843024 | . | G | 3513944 | N39-chromosome | N40-chromosome |
| 5843024 | . | G | 3513945 | N39-chromosome | N40-chromosome |
| 5843024 | . | C | 3513946 | N39-chromosome | N40-chromosome |
| 5843024 | . | G | 3513947 | N39-chromosome | N40-chromosome |
| 5843024 | . | C | 3513948 | N39-chromosome | N40-chromosome |
| 5843024 | . | G | 3513949 | N39-chromosome | N40-chromosome |
| 5843024 | . | G | 3513950 | N39-chromosome | N40-chromosome |
| 5843024 | . | G | 3513951 | N39-chromosome | N40-chromosome |
| 5843024 | . | C | 3513952 | N39-chromosome | N40-chromosome |
| 5843024 | . | C | 3513953 | N39-chromosome | N40-chromosome |
| 5843024 | . | C | 3513954 | N39-chromosome | N40-chromosome |
| 5843024 | . | C | 3513955 | N39-chromosome | N40-chromosome |
| 5843024 | . | C | 3513956 | N39-chromosome | N40-chromosome |

[illegible]

|         |   |   |         |                |                |
|---------|---|---|---------|----------------|----------------|
| 5843024 | . | G | 3514000 | N39-chromosome | N40-chromosome |
| 5843024 | . | G | 3514001 | N39-chromosome | N40-chromosome |
| 5843024 | . | G | 3514002 | N39-chromosome | N40-chromosome |
| 5843024 | . | G | 3514003 | N39-chromosome | N40-chromosome |
| 5843024 | . | G | 3514004 | N39-chromosome | N40-chromosome |
| 5843024 | . | C | 3514005 | N39-chromosome | N40-chromosome |
| 5843024 | . | C | 3514006 | N39-chromosome | N40-chromosome |
| 5843024 | . | G | 3514007 | N39-chromosome | N40-chromosome |
| 5843024 | . | C | 3514008 | N39-chromosome | N40-chromosome |
| 5843024 | . | G | 3514009 | N39-chromosome | N40-chromosome |
| 5843024 | . | G | 3514010 | N39-chromosome | N40-chromosome |
| 5843024 | . | C | 3514011 | N39-chromosome | N40-chromosome |
| 5843024 | . | G | 3514012 | N39-chromosome | N40-chromosome |
| 5843026 | . | G | 3514015 | N39-chromosome | N40-chromosome |
| 5843026 | . | T | 3514016 | N39-chromosome | N40-chromosome |
| 5843026 | . | A | 3514017 | N39-chromosome | N40-chromosome |

Note: the point in the table represents a base deletion.



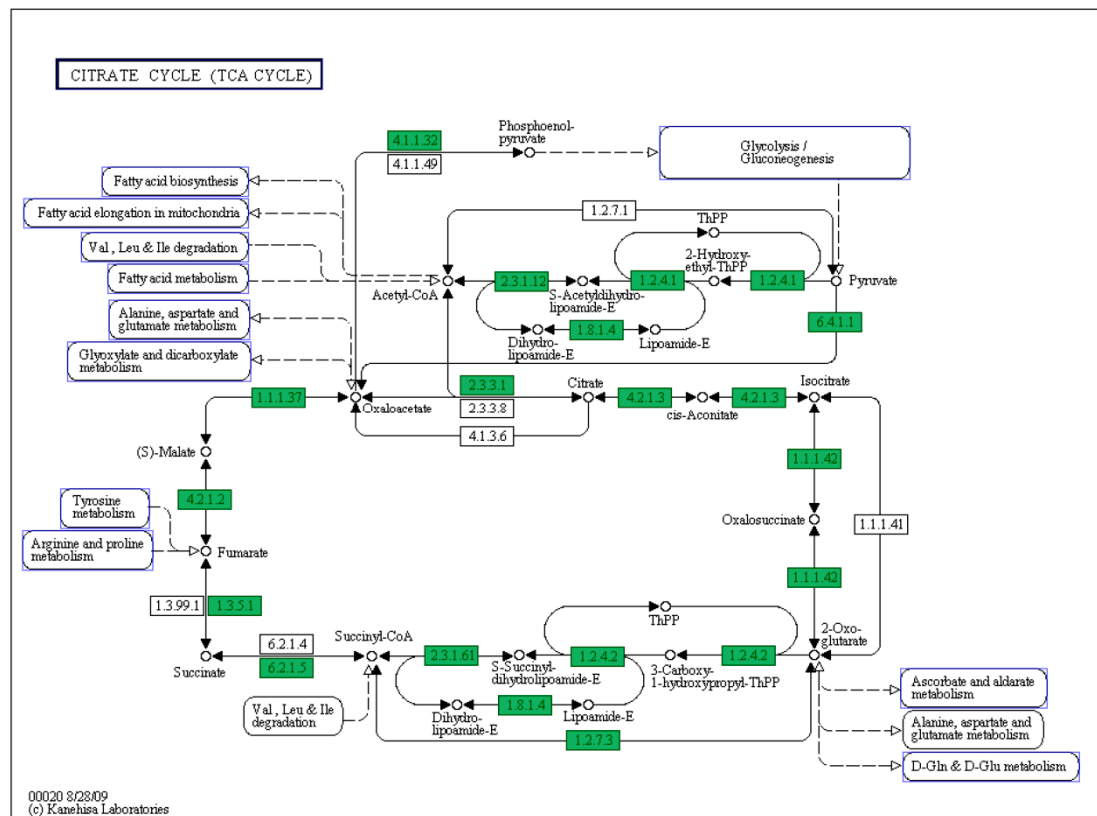

Figure S2 The metabolic pathway of citrate cycle in N39 obtained from KEGG database. Green box represents the enzyme annotated in genome of N39.
